# Supplementary material for: Menaquinone Production by Engineering a DegU Quorum Sensing Circuit in Bacillus subtilis
Source: Research Square preprint supplement (doi:10.21203/rs.3.rs-3174556/v1), 2023-07-20
Supplement: Supplementary file 1 [file 8905de98afe66a19f0ce3ae0.docx]

Table s1 Strains and plasmids used in this study

| Name | Characterists | Source |
| --- | --- | --- |
| strains | | |
| *Bacillus subtilis* 168 |  | lab stock |
| BS168-*ispG*::P43 | BS168 derivate, Cmr-P43-*ispG* | This study |
| BC00 | BS168 derivate, Cmr-*degU*-eGFP | This study |
| BC01 | BC00 derivate, Cmr-Pgrac100-*rapG* | This study |
| BC02 | BC00 derivate, Cmr-Phag-*rapG* | This study |
| BC03 | BC00 derivate, Cmr-Phag-*rapG*, Cmr-Phag-*phrG* | This study |
| BL01 | BS168 derivate, △*rapG* | This study |
| BL02 | BS168 derivate, △*phrG* | This study |
| BL03 | BS168 derivate, △*degU* | This study |
| BN00 | BS168 derivate, Cmr-Pgrac100-*degU* | This study |
| BN01 | BN00 derivate, PdegQ-eGFP | This study |
| BN02 | BN00 derivate, PcomK-eGFP | This study |
| BN03 | BN00 derivate, PsacB-eGFP | This study |
| BN04 | BN00 derivate, PaprE-eGFP | This study |
| BN05 | BN00 derivate, Pbpr-eGFP | This study |
| BN06 | BN00 derivate, PflgB-eGFP | This study |
| BN07 | BN00 derivate, PsacX-eGFP | This study |
| BN08 | BN00 derivate, PwapA-eGFP | This study |
| BN09 | BN00 derivate, P1-eGFP | This study |
| BN10 | BN00 derivate, P2-eGFP | This study |
| BN11 | BN00 derivate, P3-eGFP | This study |
| BN12 | BN00 derivate, P4-eGFP | This study |
| BN13 | BN00 derivate,P5-eGFP | This study |
| BN14 | BN00 derivate,P6-eGFP | This study |
| BN15 | BN00 derivate, P7-eGFP | This study |
| BN16 | BN00 derivate, P8-eGFP | This study |
| BS01 | BS168 derivate, Cmr-Phag-*rapG* | This study |
| BS02 | BS01 derivate, Cmr-Phag-*phrG* | This study |
| BS03 | BS02 derivate, Cmr-P43-*degU* | This study |
| BS04 | BS03 derivate, Cmr-P5-*hepS* | This study |
| BS05 | BS04 derivate, Cmr-P5-*hepT* | This study |
| BS06 | BS05 derivate, Cmr-P5-*ispH* | This study |
| Plasmids | | |
| P7C6 | Pmd18-T containing lox71-zeo-lox66 cassette | lab stock |
| PDG148 | Amp,Km,E.coli-B.subtilis shuttle vector,  containing cre under the control of Pspac | lab stock |
| pHT-XCR6 | Amp,Cm,containing Pgrac100 | lab stock |

Table s2 Primer sequences

| Primes | sequence(5'→3') |
| --- | --- |
| rapG-L-F | TTTGTGGTCTTTACGGCTTTG |
| rapG-L-R | ATCCGCTCGTGAAACTCCTTTCTCTAGTGACT |
| rapG-L-P7C6-F | AGGAGTTTCACGAGCGGATAACAATTTCACACA |
| rapG-L-P7C6-R | TAACGCTGCCCACCTATCATACCGTTCG |
| P7C6-Phag-F | ATAGGTGGGCAGCGTTATCCAGCG |
| P7C6-Phag-R | GGGTGCGATCTTATTCATTGTTTTGTTCCTCCCTGAATATG |
| Phag-rapG-F | GGGAGGAACAAAACAATGAATAAGATCGCACCCG |
| Phag-rapG-R | CTTTCTCGGACAACAAGTCAT |
| rapG-F | TGCTTGCCTACTTCTCCTTAT |
| rapG-R | GTGAAATTGTTATCCGCTCTTATATAACCTCCGTTCGTTTAATCAGT |
| rapG-P7C6-F | ATTAAACGAACGGAGGTTATATAAGAGCGGATAACAATTTCACACAG |
| rapG-P7C6-R | CGCTGCCCACCTATCATACCGTTCGT |
| P7C6-Phag-F | ATAGGTGGGCAGCGTTATCCAGCG |
| P7C6-Phag-R | GCCAATCAGAAATCTTTTCATTGTTTTGTTCCTCCCTGAATATGT |
| Phag-phrG-F | AGGGAGGAACAAAACAATGAAAAGATTTCTGATTGGCG |
| phrG-R | CACGGCGATTTGAATACACTT |
| degU-L-F | CAAATGCTGGCGAATGTTATG |
| degU-L-R | CGGGTAAGCCACGCCTCCT |
| P7C6-F | CGTGGCTTACCCGGGGATCCTC |
| P7C6-R | AACAATGTTTACTTTAGTCACGTGTACATTCCTCTCTTACCTATAATG |
| degU-F | AGAGAGGAATGTACACGTGACTAAAGTAAACATTGTTATTATCGAC |
| degU-R | GTTGTTCACGCATTTCTTTCG |
| degU-L-F | TATCCGAGGTCAGCCGTAA |
| degU-L-R | CGCTCAAGCCACGCCTCCTT |
| degU-L-P7C6-F | GCGTGGCTTGAGCGGATAACAATTTCACAC |
| P7C6-R-Pgrac100 | CGCTTACATCATTCTTTTCTACCGTTCGTATAATGTATGCTATACGAAG |
| P7C6-Pgrac100-F | AGCATACATTATACGAACGGTAGAAAAGAATGATGTAAGCGTGAAA |
| Pgrac100-R-degU | ACAATGTTTACTTTAGTCACGGATCCCACCTCCTTTAATTG |
| Pgrac100-degU-F | GGAGGTGGGATCCGTGACTAAAGTAAACATTGTTATTATCGAC |
| degU-R-R | CACTTCACATTCCCGCCTA |
| ΔrapG-L-F | TGGTCTTTACGGCTTTGGC |
| ΔrapG-L-R-P7C6 | CCCGGGTGTGAAACTCCTTTCTCTAGTGAC |
| ΔrapG-L-P7C6-F | GGAGTTTCACACCCGGGGATCCTCT |
| P7C6-R-ΔrapG-R | GCCAATCAGAAATCTTTTCATGTTCAAGCGAAAACATACCAC |
| P7C6-ΔrapG-R-F | GGTATGTTTTCGCTTGAACATGAAAAGATTTCTGATTGGCG |
| ΔrapG-R-R | ACTTCACCATCGGGCAATA |
| ΔphrG-L-F | AGAGGACAGGGCTTTCAG |
| ΔphrG-L-R-P7C6 | ATCCCCGGGTTTATATAACCTCCGTTCGTTTAATCAG |
| ΔphrG-L-P7C6-F | ACGGAGGTTATATAAACCCGGGGATCCTCT |
| P7C6-R-ΔphrG-R | CCCGCATCCAGGGTGATGTTTGTCAGTTATTAAAT |
| P7C6-ΔphrG-R-F | ACCCTGGATGCGGGGGTTCAA |
| ΔphrG-R-R | AAATTCCCGCTTGTCCTG |
| ΔdegU-L-F | TCCTAACGCACCTTCACC |
| ΔdegU-L-R-P7C6 | ATCCCCGGGTTATAATAGGAGACTTGCCTTTTACTAGG |
| ΔdegU-L-P7C6-F | GGCAAGTCTCCTATTATAACCCGGGGATCCTCT |
| P7C6-R-ΔdegU-R | GAGGCGTGGCTTAGGGTGATGTTTGTCAGTTATTAAAT |
| P7C6-ΔdegU-R-F | ACATCACCCTAAGCCACGCCTCCT |
| ΔdegU-R-R | CAGGTAGAATTGACGATGATCCA |
| ispG-L-F | AGCATCAATAGATGTTGCACTC |
| ispG-L-R-P7C6 | ATCCGCTCTCGCTCCTTAATTGTAGTTGCC |
| ispG-L-P7C6-F | AGGAGCGAGAGCGGATAACAATTTCACACAG |
| P7C6-R-ispG | ATTTCACTCACTTGCAAGTGTACATTCCTCTCTTACCTATAATGG |
| P7C6-ispG-F | GTAAGAGAGGAATGTACACTTGCAAGTGAGTGAAATCACAC |
| ispG-R | TAGTCAAACGCTTTCGCTG |
| degQ-L-F | ATTGAAAGCAACAACTGGGACA |
| degQ-L-R-eGFP | CTTGCTCACCATCGTTTCCACACTCCTTTTTT |
| degQ-L-eGFP-F | GTGTGGAAACGATGGTGAGCAAGGGC |
| egfp-R-P7C6 | CCCGGGTCTTGTACAGCTCGTCCATG |
| egfp-P7C6-F | GAGCTGTACAAGACCCGGGGATCCTCT |
| P7C6-R-degQ | CAAGTTTCTTTTCCATGTTCAAGCGAAAACATACCACC |
| P7C6-degQ-F | TGGTATGTTTTCGCTTGAACATGGAAAAGAAACTTGAAGAAGTAAAAC |
| degQ-R-R | AACGACTCCGAGCGATTA |
| comK-L-F | TTGCCAGCGACGATTCCA |
| comK-L-R-eGFP | CCTTGCTCACCATATTATGGCCTCCATCCTTTTTC |
| comK-L-eGFP-F | ATGGAGGCCATAATATGGTGAGCAAGGGC |
| egfp-R-P7C6 | CCCGGGTCTTGTACAGCTCGTCCATG |
| egfp-P7C6-F | GAGCTGTACAAGACCCGGGGATCCTCTAG |
| P7C6-R-comK | CGTCTGTTTTCTGACTCATGTTCAAGCGAAAACATACCAC |
| P7C6-comK-F | GTTTTCGCTTGAACATGAGTCAGAAAACAGACGC |
| comK-R-R | ATCTTCGTCCGCTCTTCT |
| sacB-L-F | CTGATTCACCGCAATCTTGT |
| sacB-L-R-egfp | CCCTTGCTCACCATCGTTCATGTCTCCTTTTTTATGTAC |
| sacB-L-egfp-F | AGACATGAACGATGGTGAGCAAGGGC |
| egfp-R-P7C6 | CCCGGGTCTTGTACAGCTCGTCCATG |
| egfp-P7C6-F | GAGCTGTACAAGACCCGGGGATCCTCTAG |
| P7C6-R-sacB | TGCAAACTTTTTGATGTTCATGTTCAAGCGAAAACATACCAC |
| P7C6-sacB-F | GGTATGTTTTCGCTTGAACATGAACATCAAAAAGTTTGCAAAACA |
| sacB-R | TCTGCGTAGAATCCTCTGTTT |
| aprE-L-F | CTGCAAGGCTTGAAATAACG |
| aprE-L-R-egfp | CCCTTGCTCACCATTCTTTACCCTCTCCTTTTAAAAAAATTCAG |
| aprE-L-egfp-F | GGAGAGGGTAAAGAATGGTGAGCAAGGGC |
| egfp-R-P7C6 | CCCGGGTCTTGTACAGCTCGTCCATG |
| egfp-P7C6-F | GAGCTGTACAAGACCCGGGGATCCTCTAG |
| P7C6-R-aprE | TTTGCTTCTCACGTTCAAGCGAAAACATACCACC |
| P7C6-aprE-F | GTTTTCGCTTGAACGTGAGAAGCAAAAAATTGTGGATCA |
| aprE-R | GGAGCCATCACATCAAGC |
| bpr-L-F | ATGAACATCACTGGAGGAACA |
| bpr-L-R-eGFP | CCTTGCTCACCATTTTCATCCCCCTTTTTCAACATG |
| bpr-L-eGFP-F | GGGGGATGAAAATGGTGAGCAAGGGC |
| egfp-R-P7C6 | CCCGGGTCTTGTACAGCTCGTCCATG |
| egfp-P7C6-F | GAGCTGTACAAGACCCGGGGATCCTCTAG |
| P7C6-R-bpr | TCGTTTTTTTCCTCATGTTCAAGCGAAAACATACCACC |
| P7C6-bpr-F | GGTATGTTTTCGCTTGAACATGAGGAAAAAAACGAAAAACAGAC |
| bpr-R | AAATGTCAGCATCAGTGCC |
| flgB-L-F | ATACTGCTTTCCCTGTTGAGA |
| flgB-L-R-eGFP | CCTTGCTCACCATATCCACTTACCTCCATTTCAGT |
| flgB-L-eGFP-F | GGAGGTAAGTGGATATGGTGAGCAAGGGC |
| egfp-R-P7C6 | CCCGGGTCTTGTACAGCTCGTCCATG |
| egfp-P7C6-F | GAGCTGTACAAGACCCGGGGATCCTCTAG |
| P7C6-R-flgB | CCAGAAAATAAGCTCAAGTTCAAGCGAAAACATACCACC |
| P7C6-flgB-F | ATGTTTTCGCTTGAACTTGAGCTTATTTTCTGGAACGATACAA |
| flgB-R | ATTCATCGCCGTGACATT |
| sacX-L-F | CAGCAATCCGTATCTGCG |
| sacX-L-R-eGFP | CTTGCTCACCATGCAATTAAAACCTCCTTTGCTG |
| sacX-L-eGFP-F | GGAGGTTTTAATTGCATGGTGAGCAAGGGC |
| egfp-R-P7C6 | CCCGGGTCTTGTACAGCTCGTCCATG |
| egfp-P7C6-F | GAGCTGTACAAGACCCGGGGATCCTCTAG |
| P7C6-R-sacX | TCTTTTGCAATCTCTTTATGCAAGTTCAAGCGAAAACATACCAC |
| P7C6-sacX-F | GGTATGTTTTCGCTTGAACTTGCATAAAGAGATTGCAAAAGAATT |
| sacX-R | GATAGGACGATGGTGGAGTAG |
| wapA-L-F | TCTTTCTTGTATTCAACTGGGTG |
| wapA-L-R-eGFP | CCCTTGCTCACCATTTCCTCTCTCCTTTTGTAATAAAAGTAATATT |
| wapA-L-eGFP-F | AGGAGAGAGGAAATGGTGAGCAAGGGC |
| egfp-R-P7C6 | CCCGGGTCTTGTACAGCTCGTCCATG |
| egfp-P7C6-F | GAGCTGTACAAGACCCGGGGATCCTCTAG |
| P7C6-R-wapA | GCCTCTTTCTTTTTTTCATGTTCAAGCGAAAACATACCACC |
| P7C6-wapA-F | ATGTTTTCGCTTGAACATGAAAAAAAGAAAGAGGCGAAAC |
| wapA-R | TGTCTGACCGTTCAACCTC |
| cre-F | GCCTGCATTACCGGTCGATG |
| cre-R | CTAATCGCCATCTTCCAGCAGGC |
| ispH-L-F | GCGAGGACCTTCATTTGG |
| ispH-L-R-P7C6 | TGTTATCCGCTCTTTCGGTTGTCCTCCAATACT |
| ispH-L-P7C6-F | AGGACAACCGAAAGAGCGGATAACAATTTCACAC |
| P7C6-R-P | CGTTCTTCGGTTACGATATAAATCCACCTATCATACCGTTCGTATA |
| P7C6-P-F | ACGGTATGATAGGTGGATTTATATCGTAACCGAAGAACGTT |
| P-R-ispH | CGGTGAAATTTTAATTACGTCCATTCTTTACCCTCTCCTTTTAAAAAAATTCA |
| P-ispH-F | AAAGGAGAGGGTAAAGAATGGACGTAATTAAAATTTCACCG |
| ispH-R-R | CACTTGAGTAGCGAGGC |
| hepS-L-F | CGGAGAAGACCCGAATAG |
| hepS-L-R-P7C6 | GTTATCCGCTCAAATATCACCCTTGTCCCCAAA |
| hepS-L-P7C6-F | GGGACAAGGGTGATATTTGAGCGGATAACAATTTCACACA |
| P-R-hepS | CCGTAGATGTCTTGCAATCTTTACCCTCTCCTTTTAAAAAAATTCAG |
| P-hepS-F | GGAGAGGGTAAAGATTGCAAGACATCTACGGAACT |
| hepS-R-R | TGTAGCAAGCGTCCGAAT |
| hepT-L-F | GAACACTTCAACCTCCCG |
| hepT-L-R-P7C6 | CGCTCTTTTCAGGCCCGCCT |
| hepT-L-P7C6-F | GGGCCTGAAAAGAGCGGATAACAATTTCACACAG |
| P-R-hepT | CGCCAGTAAACGAATGATATTTAACATTCTTTACCCTCTCCTTTTAAAAAAATTCAGA |
| P-hepT-F | AGGAGAGGGTAAAGAATGTTAAATATCATTCGTTTACTGGCG |
| hepT-R-R | TGGGCTTTCGGTTCGTTAA |
