# Supplementary material for: Menaquinone Production by Engineering a DegU Quorum Sensing Circuit in Bacillus subtilis
Source: Research Square preprint supplement (doi:10.21203/rs.3.rs-3174556/v1), 2023-07-20
Supplement: Supplementary file 2 [file d08e5e256b224f8c7ff19c79.docx]

**Table 1** The nucleotide sequences of the recombinant promoter core

| Promoter | sequences |
| --- | --- |
| PA | -TTGACATTTTATTGCATTTATGTTATAAT- |
| PB | -AGGTTTATTTAGGCTTGATTTTAGGGTAT- |
| PH | -AGGAATTTTTATGTCTATTTACGAAT- |
| PBH | -AGGTTTCTATTTAGGAATTTTTAGGGTATTTTACGAAT- |
| PHA | -AGGAATTTTGACATCTATTTACGAATTTGATATAAT- |
| PBA | -AGGTTTTTGACATGATCTATTTAGGGTATTATAAT- |
| PHAB | -AGGAATTTGACAAAGGTTTTACGAATTTTTATAATAAGGGTAT- |
| PHBA | -AGGAATTATTTAGGTTTAAATCGAATTGACATTTGGGTATTCTATTTATATAAT- |

aThe consensus sequences recognized by σA, σB and σH were indicated with green, red and orange

The sequence of the original promoter

PdegQ:TCATACGGATACACGTAAAACCAGGGATAACGATATCTCATGGGAGCACCTCGCAAAAAAGGATGTTTCTATATGTATAGATCCCTAATTGCCGAATATGACAAAGCGAAAAGGCCACAACTTTAGCGTTGCGGTCTTTTTCGGTGTTTGTCGGTCAGGAAACGCCAAGAATCGCATATTCAATTTTGAAAATACGGTATGAAGGACTATAGTCTTGCTTAGTGAAAATGCGAAACCCGTTAAAATCAAGGAGATTAAGAATCTTTCTCAATTTCAGCACATATAAACGCTCTTTCGCATAGAAAGATAGTCCCGTTCTTGTTGTGATTCCTTTGAGTATAAGGACCTATTGAGATTTGCGGTGTCACGCAGGACTTTTTTGCATACTTTTCGGTGAAAAATGAGCCGAAAGCAGACACACTATTAGTAACAGATCAAATACCTAGGACTCGTTCACCATACACAATTCATTGATCTTTCAAAAAAAGGAGTGTGGAAACG

PcomK:GGATAATAAAAAGCCAATCCTTGAAGGATTGGCTTATTCGCTCTGCTTGAGCGCTGCATATTCTTTAGAGAGCGTAAGAAACGCATCTTTATCTTTTTCGTCCAAGGCTTTGTTAATTTGGTCCGTCAGCATGGCAAGCCGACGGTTATACAAGGATTCATCGAGCACCATTTGAATGTAAATATCCGTCATTGTGACATCGAATTCTTTTGTTTTTTGCGTGTTGCGGGACTTCATGAGCTCAGTGTACGATTTTTTCTCTTTCATAAAGAATCCCCCCAATGCCTTTTTTATAGTATATGGATAACGGT CGAAAAAATCAATAAATTTTTATAATTTTTAGA

PsacB:TCGCCTAATGTCTCAAATAACGTCTGAAGATGCTTTCTTTTATTCTGCTTCATTCCTCCACCTCCCATATCTCTGTACGTTACTAACCTACTAACGTTTCAAATATTTTGAAAAATCCTTCAGTTAGAGATCCTTTTTAACCCATCACATATACCTGCCGTTCACTATTATTTAGTGAAATGAGATATTATGATATTTTCTGAATTGTGATTAAAAAGGCAACTTTATGCCCATGCAACAGAAACTATAAAAAATACAGAGAATGAAAAGAAACAGATAGATTTTTTAGTTCTTTAGGCCCGTAGTCTGCAAATCCTTTTATGATTTTCTATCAAACAAAAGAGGAAAATAGACCAGTTGCAATCCAAACGAGAGTCTAATAGAATGAGGTCGAAAAGTAAATCGCGCGGGTTTGTTACTGATAAAGCAGGCAAGACCTAAAATGTGTAAAGGGCAAAGTGTATACTTTGGCGTCACCCCTTACATATTTTAGGTCTTTTTTTATTGTGCGTAAC

PaprE:ATTTATATCGTAACCGAAGAACGTTCAAAAAACCAAATCATCAAGCCGCCATTTTCACTTCGCCGGCACATTGAGACAATAATGGACAAATCCGGTATCCTCTTCATAGCCGTTTTGCTCATACAAGCTTCTTGCCTTCCGGTTGTGGTGCTCAGTCTGAAGTGTTAAACATTTTGCCCCGTTTTGCCCTGCATAATCCTTTGCGGCAGAAAGCAGCCGGCCGCCGGCTCCCTTTGTACGCGCATGAGGAACGACAAATAAGTCATTTAATATGTATATCCTTTTCATTGACACAGAAGAAAACGTTGGATAGAGCTGGGTAAAGCCTATGAATTCTCCATTTTCTTCTGCTATCAAAATAACAGACTCGTGATTTTCCAAACGAGCTTTCAAAAAAGCCTCTGCCCCTTGCAAATCGGATGCCTGTCTATAAAATTCCCGATATTGGTTAAACAGCGGCGCAATGGCGGCCGCATCTGATGTCTTTGCTTGGCGAATGTTCATCTTATTTCTTCCTCCCTCTCAATAATTTTTTCATTCTATCCCTTTTCTGTAAAGTTTATTTTTCAGAATACTTTTATCATCATGCTTTGAAAAAATATCACGATAATATCCATTGTTCTCACGGAAGCACACGCAGGTCATTTGAACGAATTTTTTCGACAGGAATTTGCCGGGACTCAGGAGCATTTAACCTAAAAAAGCATGACATTTCAGCATAATGAACATTTACTCATGTCTATTTTCGTTCTTTTCTGTATGAAAATAGTTATTTCGAGTCTCTACGGAAATAGCGAGAGATGATATACCTAAATAGAGATAAAATCATCTCAAAAAAATGGGTCTACTAAAATATTATTCCATCTATTACAATAAATTCACAGAATAGTCTTTTAAGTAAGTCTACTCTGAATTTTTTTAAAAGGAGAGGGTAAAGA

Pbpr:AGAGGCAGCAAAAAAAGCAATTTCCAGCCCGCTTCTTGAAGCGGCCATTGACGGTGCGCAAGGCGTCCTCATGAACATCACTGGAGGAACAAACCTCAGCCTATATGAGGTTCAGGAAGCAGCAGACATTGTCGCTTCGGCGTCTGATCAAGACGTAAACATGATTTTCGGTTCTGTTATTAATGAAAATCTAAAAGATGAGATTGTGGTGACAGTGATTGCAACCGGCTTTATCGAACAAGAGAAGGACGTGACGAAGCCTCAGCGTCCAAGCTTAAATCAAAGCATCAAAACACACAATCAAAGTGTTCCGAAGCGTGAGCCAAAACGTGAGGAACCTCAGCAGCAGAACACAGTAAGCCGTCATACTTCACAGCCGGCTGATGATACGCTTGACATCCCGACATTCTTAAGAAACCGTAATAAACGCGGCTAATGTAAAGGACAAAATCGTTTTCGATTTTGTCCTTTTTTGTTTTTCTCTTCACACTTTCCTTCTTATAAAGTCTTTTTCCCTATTGCTTCCTTCGCTTAGTAACAAAACAGATAATTAGACCCATTTATTTTTG TGACATTTTTATCATTTTCATAT

PflgB:CTGTTGAGAACAGAGACCTGTTTCAAGCTGGTTTAACAACAATTGTGCCGATCATCGGAGGCGGGGAAAGATTAGGAACACTTATTCTTTCGCGTTTACAAGATCAATTCAATGACGATGACTTAATTCTAGCTGAATACGGCGCAACAGTTGTCGGAATGGAAATCCTAAGAGAAAAAGCAGAAGAAATTGAAGAGGAAGCAAGAAGCAAAGCTGTCGTACAAATGGCTATCAGCTCGCTTTCTTACAGTGAGCTTGAAGCAATTGAGCACATTTTTGAGGAGCTTGACGGAAATGAAGGTCTTCTTGTTGCAAGTAAAATTGCTGACCGTGTCGGCATTACCCGTTCTGTTATTGTGAACGCACTCAGAAAGCTGGAGAGCGCCGGTGTTATCGAGTCTAGATCATTAGGAATGAAAGGTACTTATATCAAGGTACTAAACAACAAATTCCTAATTGAATTAGAAAATCTAAAATCTCATTAATCACAAAAAGAACCCTTTTTGAGGGTTCTTTTTTT ATTTCAAATAAAGGAA

PsacX:CGCGTCAAAGCAAGCGAAAGACAAAGTTGCGAAAGCGGAAAAAAGCAAAAAGAAAACAGATGTGGACAGCGCACAATCAGCAATTGGCAAGCTGCCTGCAAGTTCAGAAAAAACGTCCCTGCAGAAACGCCTTAACAAAGTGAAGAGCACCAATTTGAAGACGGCACAGCAATCCGTATCTGCGGCTGAAAAGAAATCAACTGATGCAAATGCGGCAAAAGCACAATCAGCCGTCAATCAGCTTCAAGCAGGCAAGGACAAAACGGCATTGCAAAAACGGTTAGACAAAGTGAAGAAAAAGGTGGCGGCGGCTGAAGCAAAAAAAGTGGAAACTGCAAAGGCAAAAGTGAAGAAAGCGGAAAAAGACAAAACAAAGAAATCAAAGACATCCGCTCAGTCTGCAGTGAATCAATTAAAAGCATCCAATGAAAAAACAAAGCTGCAAAAACGGCTGAACGCCGTCAAACCGAAAAAGTAACCAAAAACCTTTAAGATTTGCATTCCAAGTCTTAAAGGTTTTTTTCATTCTAAGAACACCACACACAACCTTTTTCCCATCCATTGTACAGGCTTTTCATACTATTGCTATACAGCCATGAACAGCATAAAATGAACGTT

PwapA:GTGACAGCTGAGGGTACGGATATTGAACAAATACAATAAAAAATGTAAAAAGGCCTATGCGGCCTTTTTTTGTTTTAGGTCAATTGACTCTCGCTAATCCTTAAAATAAGATAAATTTTCTAGAAAAATATTGTAATGATATTTCAGTCTAGTTAAGATTATTGA
